# Supplementary material for: Chemoselective decarboxylation of ceiba oil to diesel-range alkanes over a red mud based catalyst under H2-free conditions
Source: Royal Society of Chemistry journal article supplement (doi:10.1039/d2ra00853j), 2022-01-01
Supplement: d2ra00853j1.pdf [file d2ra00853j1.pdf]

### List of supplementary

1. TGA of fresh red mud ( $RM_x$ )
2. XRD diffractogram of fresh red mud ( $RM_x$ )
3.  $N_2$  adsorption-desorption isotherms of (A)  $RMO_x$ , (B)  $Ni/RMO_x$ , (C)  $Ni/rRM_1$  and  $Ni/rRM_3$  and (D)  $Ni/rRM_2$  catalysts
4. Pore size distribution (BJH) curves of (A)  $RMO_x$ , (B)  $Ni/RMO_x$  and (C)  $Ni/rRM_x$  catalysts
5. TPD- $NH_3$  peaks for A)  $RM_x$ , B)  $Ni/RMO_x$  and C)  $Ni/RM_x$  catalysts
6. Alkanes and alkenes  $n-(C_{15} + C_{17})$  distribution for  $RMO_x$ ,  $Ni/RMO_x$  and  $Ni/rRM_x$  catalysed DO reaction
7. FTIR spectra of deoxygenated liquid product catalysed by (A)  $RMO_x$ , (B)  $Ni/RMO_x$  and (C)  $Ni/rRM_x$  catalysts
8. Gas analysis for  $Ni/RMO_3$  catalysed DO. Operating parameter:  $T = 350\text{ }^\circ\text{C}$ , 2 h reaction time, 3 wt.% of catalyst loading.

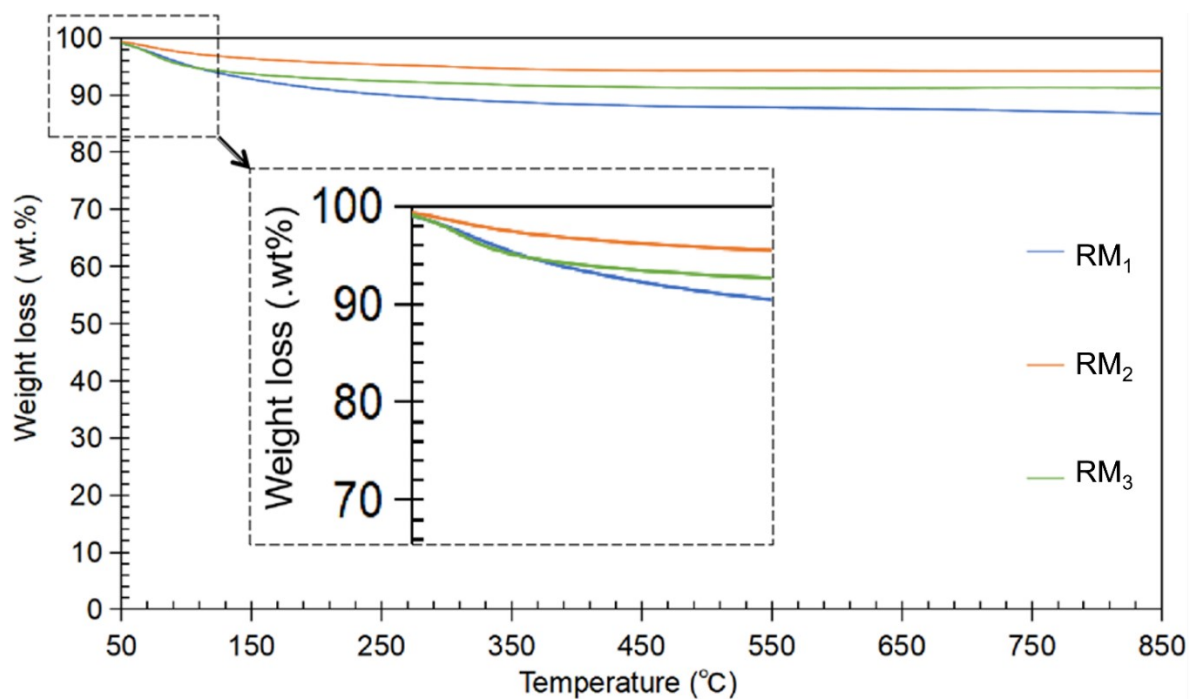

Fig. S1. TGA of fresh red mud ( $RM_x$ ).

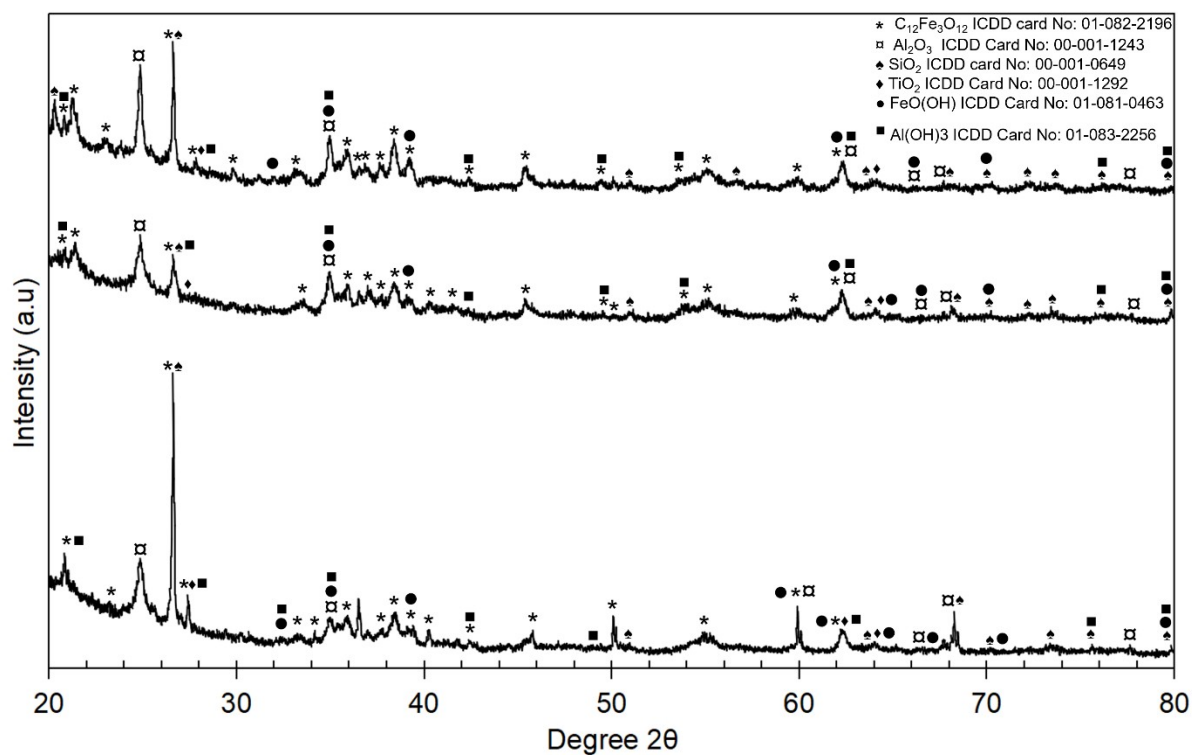

Fig. S2. XRD diffractogram of fresh red mud ( $RM_x$ ).

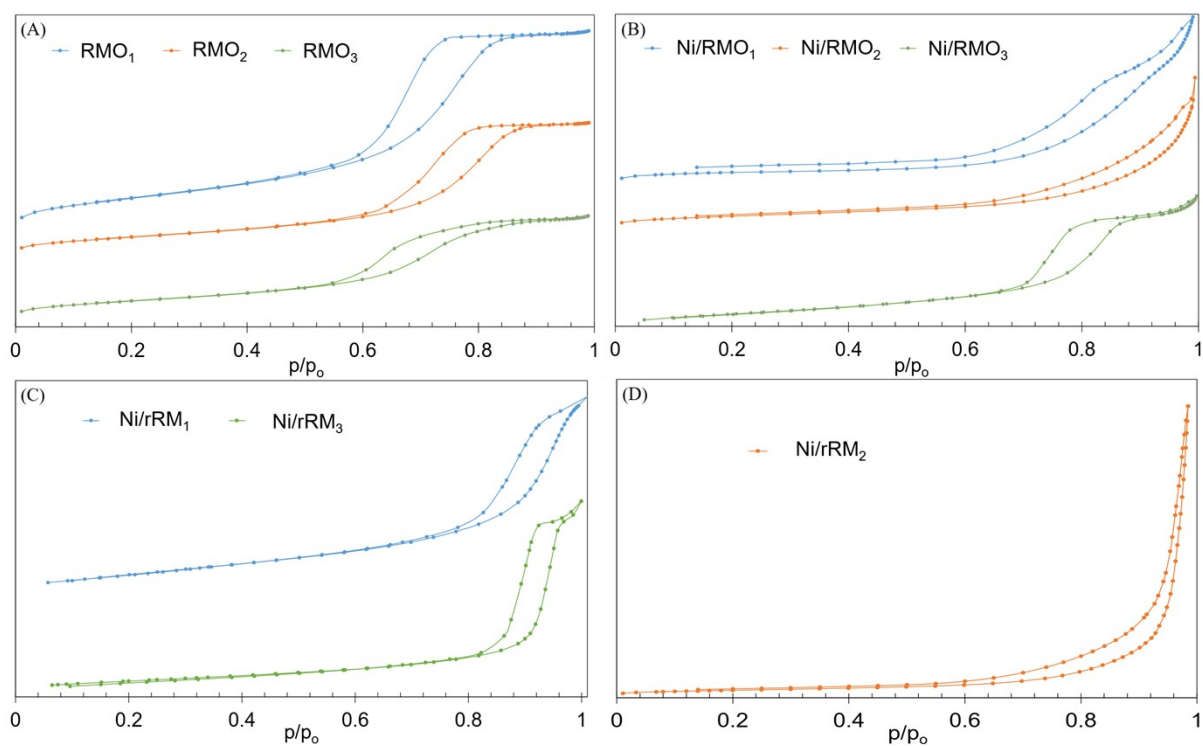

**Fig. S3.**  $N_2$  adsorption-desorption isotherms of (A)  $RMO_x$ , (B)  $Ni/RMO_x$ , (C)  $Ni/rRM_1$  and  $Ni/rRM_3$  and (D)  $Ni/rRM_2$  catalysts.

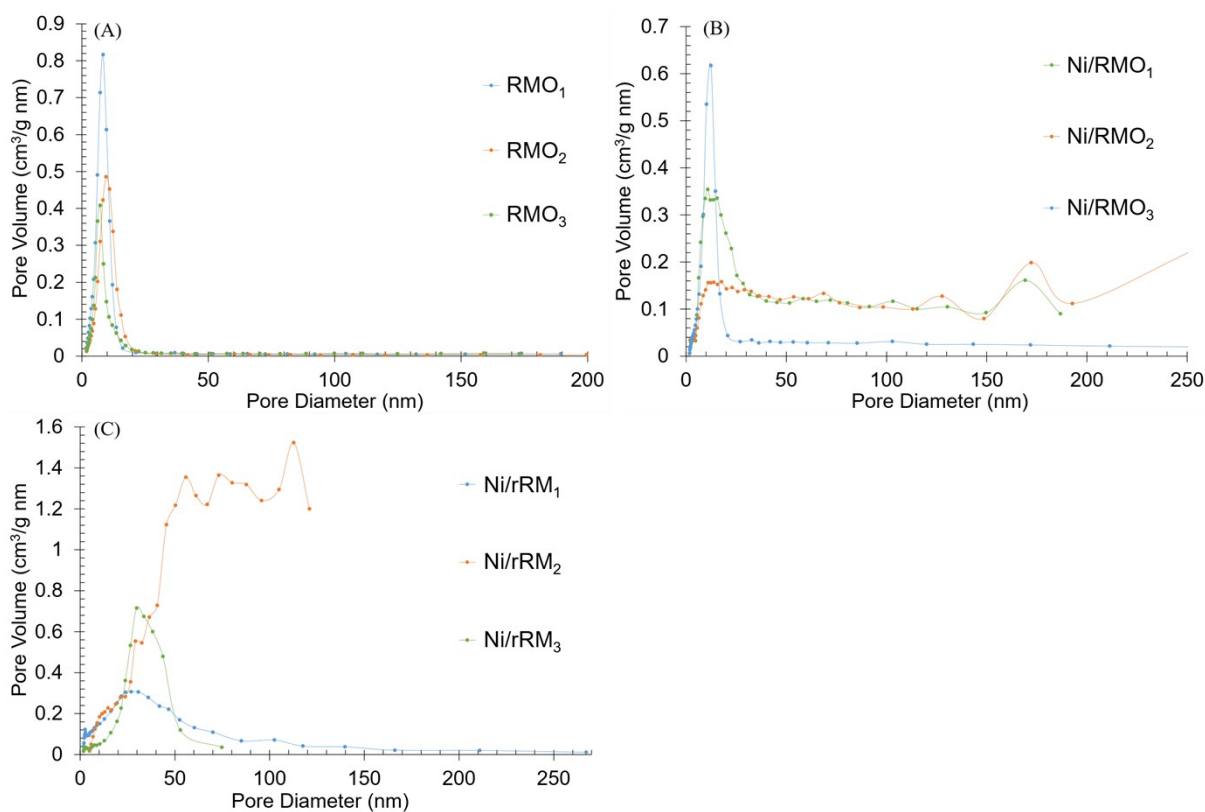

**Fig. S4.** Pore size distribution (BJH) curves of (A)  $RMO_x$ , (B)  $Ni/RMO_x$  and (C)

$Ni/rRM_x$  catalysts.

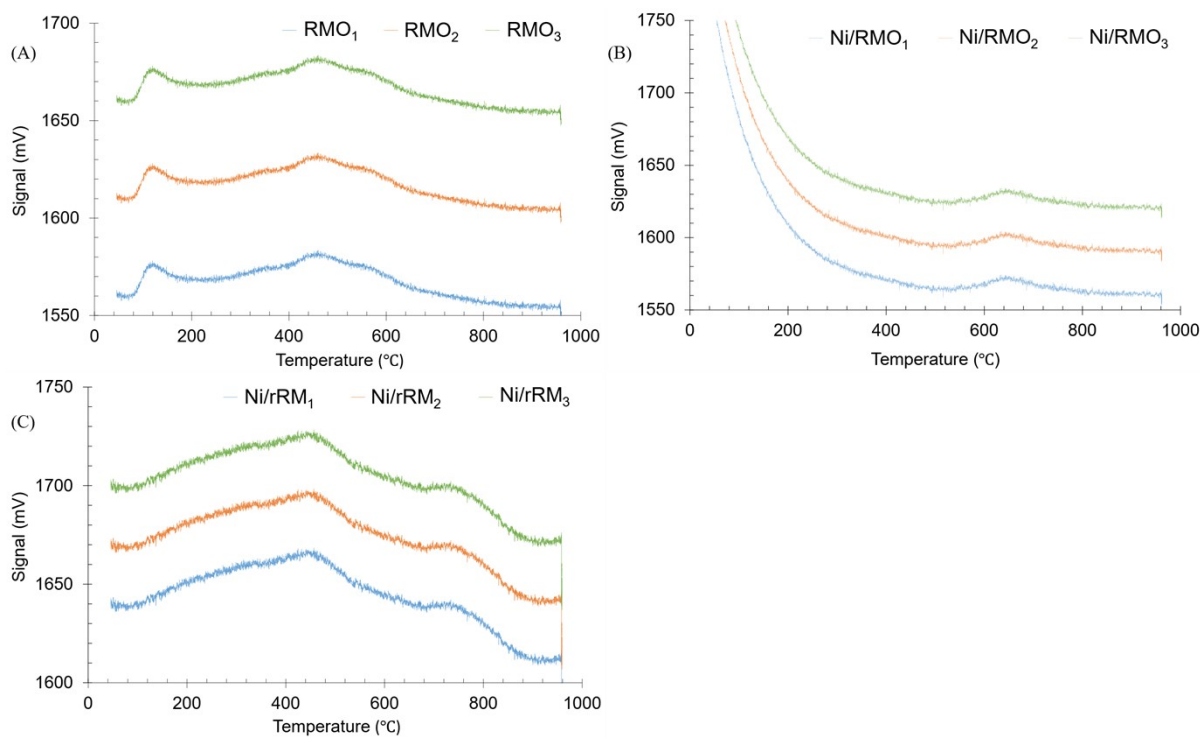

**Fig. S5.** TPD- $\text{NH}_3$  peak of (A)  $RMO_x$ , (B)  $Ni/RMO_x$  and (C)  $Ni/rRM_x$  catalysts.

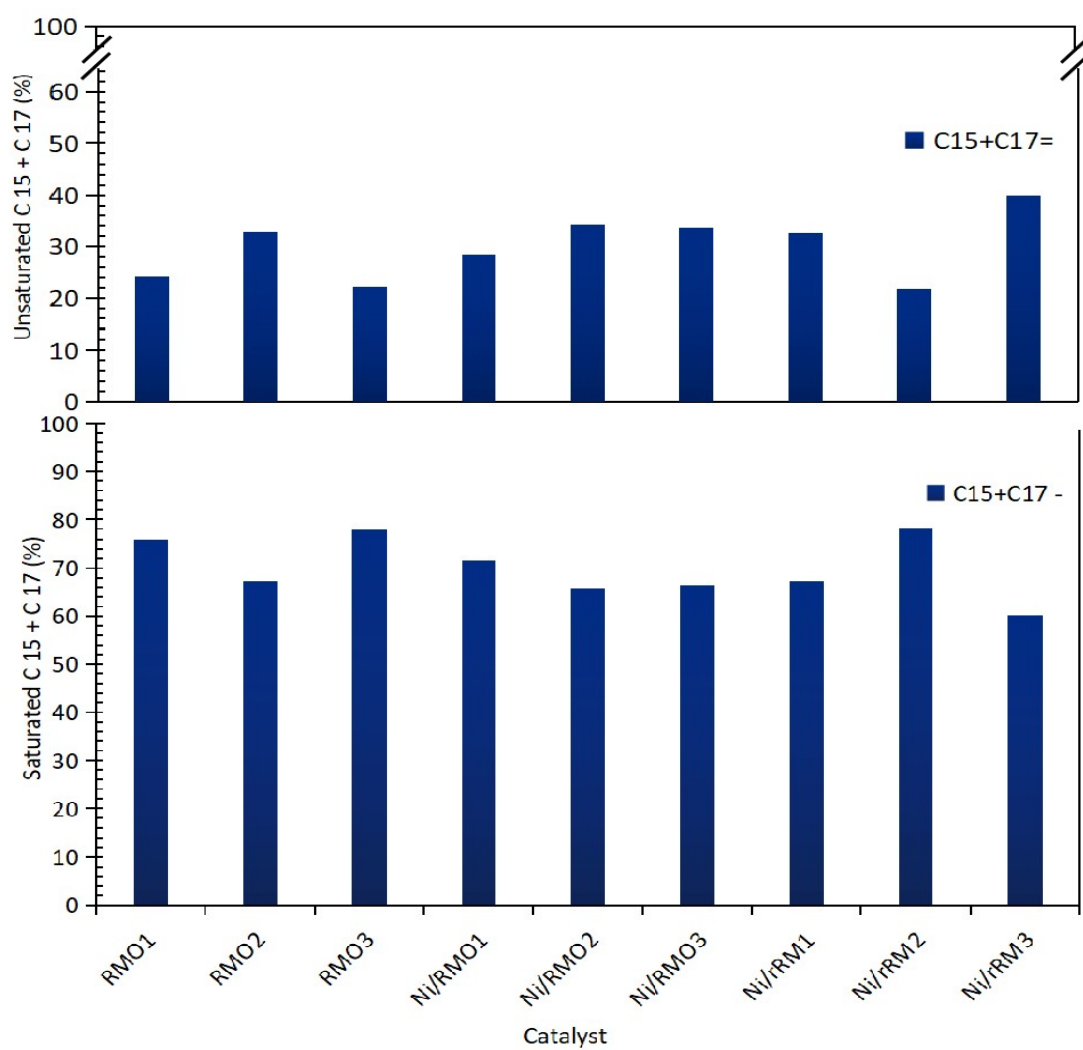

**Fig. S6.** Alkanes and alkenes  $n$ -( $C_{15} + C_{17}$ ) distribution for  $RMO_x$ ,  $Ni/RMO_x$  and  $Ni/rRM_x$  catalysed DO reaction. Reaction condition:  $T = 350\text{ }^\circ\text{C}$ , 2 h reaction time, 3 wt.% of catalyst loading.

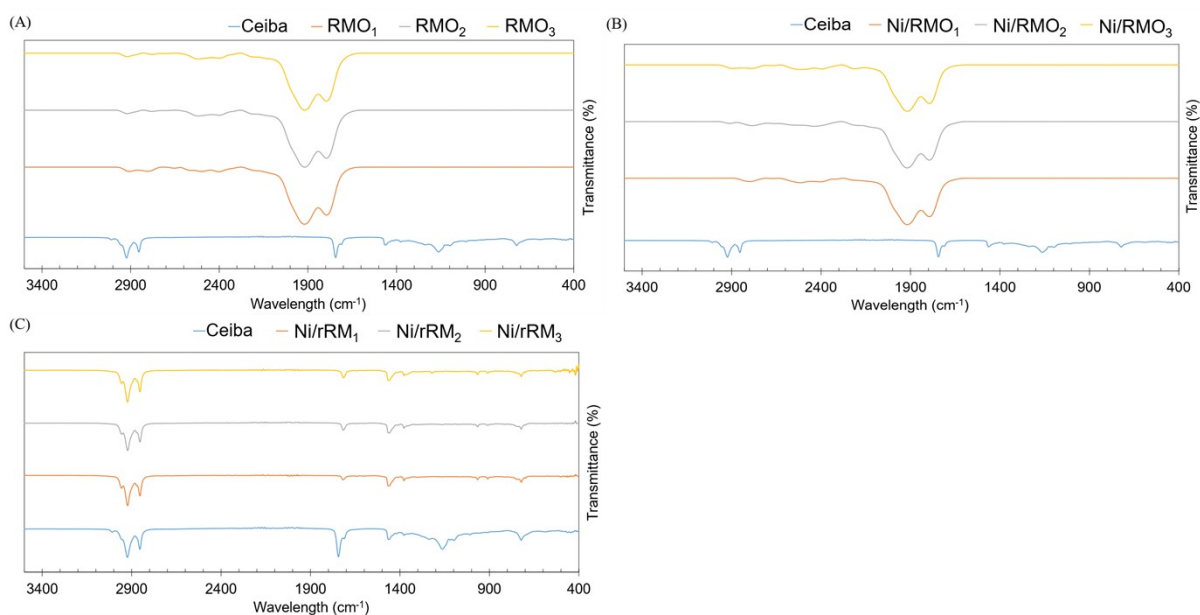

**Fig. S7** FTIR spectra of deoxygenated liquid product catalysed by (A)  $RMO_x$ , (B)  $Ni/RMO_x$  and (C)  $Ni/rRM_x$  catalysts

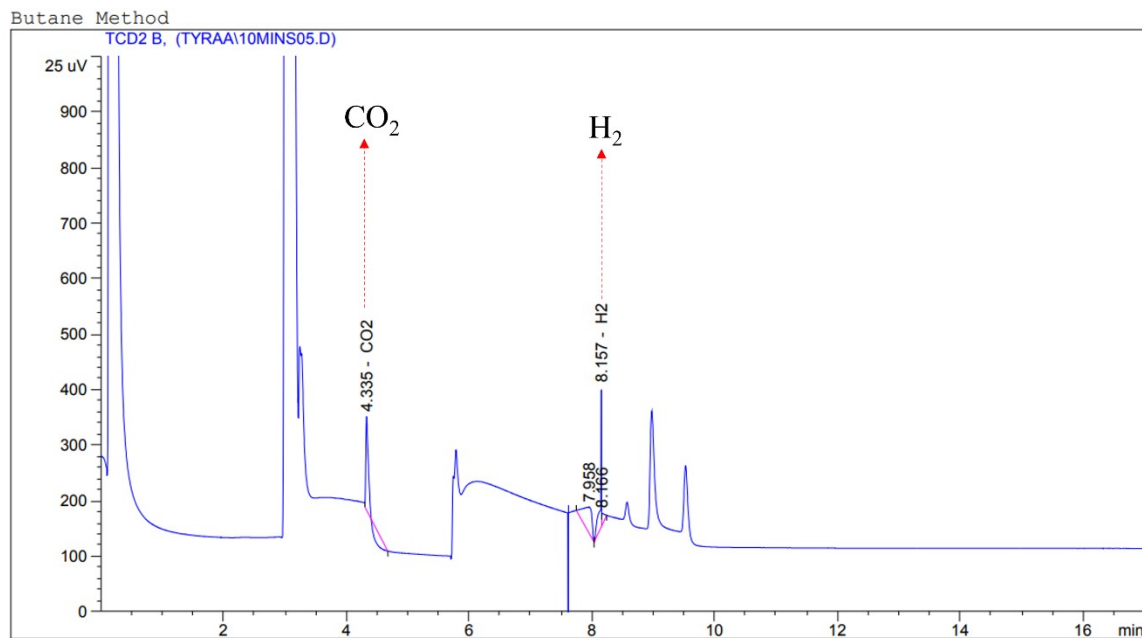

**Fig. S8.** Gas analysis for  $Ni/RMO_3$  catalysed DO. Operating parameter:  $T = 350\text{ }^\circ\text{C}$ , 2 h reaction time, 3 wt.% of catalyst loading.
